# Supplementary material for: Hydrothermal preparation, growth mechanism and supercapacitive properties of WO3nanorod arrays grown directly on a Cu substrate
Source: Royal Society of Chemistry journal article supplement (doi:10.1039/c6ce00316h), 2016-01-01
Supplement: c6ce00316h1.pdf [file c6ce00316h1.pdf]

## Electronic Supplementary Information

### Hydrothermal preparation, growth mechanism and supercapacitive properties of WO<sub>3</sub> nanorod arrays grown directly on Cu substrate

Feng Zheng<sup>a,b</sup>, Shaolei Song<sup>a,b</sup>, Fei Lu<sup>a</sup>, , Rong Li<sup>a</sup>, Naijing Bu<sup>a</sup>, Jia Liu<sup>a</sup>, Yang Li<sup>\*c</sup>, Pengfei Hu<sup>d</sup>,

Qiang Zhen<sup>\*, a,b</sup>

The XRD patterns of WO<sub>3</sub> synthesized with different inorganic salts are shown in Fig. S1. It can be seen that different crystalline phases and crystallinity could be obtained with different inorganic salts as additives. Hydrothermal products are a mixture of h-WO<sub>3</sub> and m-W<sub>18</sub>O<sub>49</sub> when rubidium salts are used as additives. The samples are h-WO<sub>3</sub> with poor crystallinity by using Li<sub>2</sub>SO<sub>4</sub> and K<sub>2</sub>SO<sub>4</sub> as additives. Na<sub>2</sub>SO<sub>4</sub> and (NH<sub>4</sub>)<sub>2</sub>SO<sub>4</sub> could lead to h-WO<sub>3</sub> nano-structures with relative high purity and crystallinity, and there is a obvious (002) peak in the sample with Na<sub>2</sub>SO<sub>4</sub> as additive. Based on the experiment mentioned above, the results of XRD patterns are more or less consistent with the SEM images in Fig. 8.

---

<sup>a</sup> Nano-science and Nano-technology Research Center, Shanghai University, Shanghai 200444, P.R. China

<sup>b</sup> Materials Science and Engineering college, Shanghai University, Shanghai 200444, P. R. China

<sup>c</sup> The State Key Laboratory for Refractories and Metallurgy, School of Materials and Metallurgy, Wuhan University of Science and Technology, Wuhan 430081, P.R. China

<sup>d</sup> Laboratory for Microstructures, Shanghai University, Shanghai 200444, P. R. China

\* Corresponding author: Yang Li; Tel.: +86 (0)27 68862129; Email: toliyang@163.com

\* Corresponding author: Qiang Zhen; Tel.: +86 (0)21 66137276; Email: qzhen@staff.shu.edu.cn

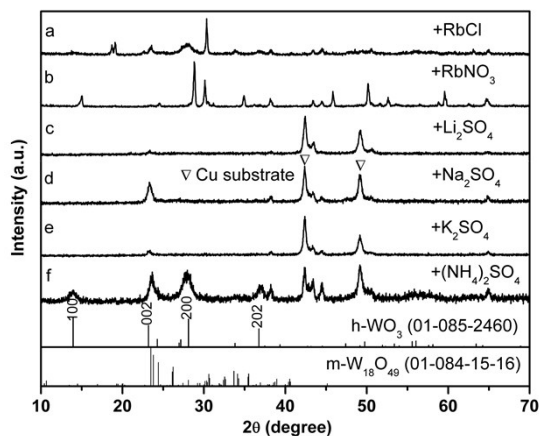

Fig. S1 XRD patterns of the samples synthesized with different inorganic salts: (a) RbCl ( $6.0 \times 10^{-3}$  mol), (b) RbNO<sub>3</sub> ( $6.0 \times 10^{-3}$  mol), (c) Li<sub>2</sub>SO<sub>4</sub> ( $3.0 \times 10^{-3}$  mol), (d) Na<sub>2</sub>SO<sub>4</sub> ( $3.0 \times 10^{-3}$  mol), (e) K<sub>2</sub>SO<sub>4</sub> ( $3.0 \times 10^{-3}$  mol), (f) (NH<sub>4</sub>)<sub>2</sub>SO<sub>4</sub> ( $3.0 \times 10^{-3}$  mol).

Fig. S2 shows the TEM images of the WO<sub>3</sub> nanorod grown under such hydrothermal conditions (pH value: 2.0, concentration of Na<sub>2</sub>WO<sub>4</sub>: 0.10 mol L<sup>-1</sup>, Rb<sub>2</sub>SO<sub>4</sub> additive:  $3.0 \times 10^{-3}$  mol, reaction temperature: 180 °C, reaction time: 8 h). It can be seen that the bottom of WO<sub>3</sub> rods grows some WO<sub>3</sub> branches with small size. The morphology of these nanorods might look more like a hierarchical structure. We speculate that these WO<sub>3</sub> branches may appear from WO<sub>3</sub> polycrystalline particles on the side face of WO<sub>3</sub> nanorods in Fig. 10a.

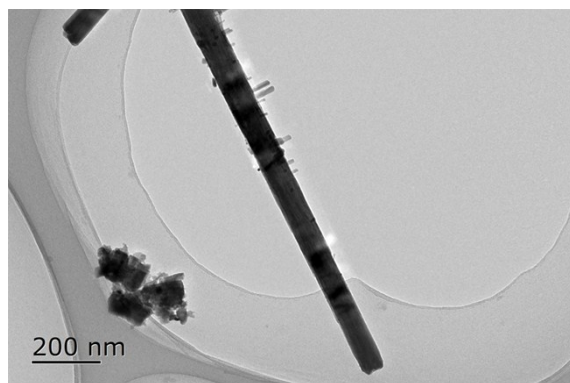

Fig. S2 TEM images of as-prepared WO<sub>3</sub> nanorod.

The Cu substrate and WNRs is to be corroded in a relatively high concentration of H<sub>2</sub>SO<sub>4</sub> solution (1 mol L<sup>-1</sup>) when a positive and negative voltage is applied to the Cu substrate alternately. Fig. S3 shows the cyclic voltammograms of WNRs in 1 mol L<sup>-1</sup> Na<sub>2</sub>SO<sub>4</sub> electrolyte in the initial cycles. It can be seen that the ions storage

capacity of the WNRs grown on Cu substrate decrease quickly. In addition, a layer of blue floccule will be formed on the interface between the WNRs and  $\text{H}_2\text{SO}_4$  solution. It might be ascribe to that the Cu substrate and WNRs are corroded by using  $\text{H}_2\text{SO}_4$  solution as electrolyte.

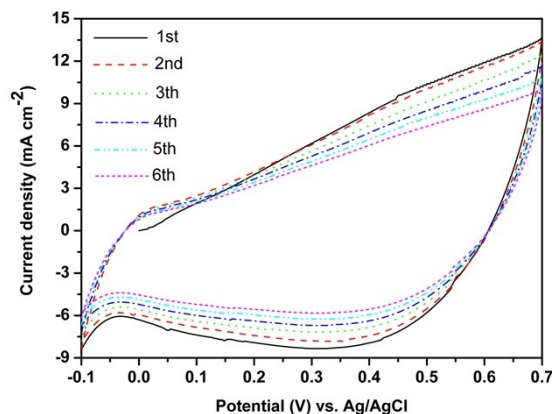

Fig. S3 Cyclic voltammograms of WNRs in  $1 \text{ mol L}^{-1} \text{H}_2\text{SO}_4$  electrolyte in the initial cycles.

Fig. S4 shows CV tests of WNRs-3 at different cycles before and after repeated galvanostatic charge-discharge for 1000 cycles at  $1 \text{ A/g}$ . From Fig. S2 b, it can be seen that the charge-discharge current densities decrease, but not very much. And no significant change in the shape of CVs appears. It might be because the  $\text{WO}_3$  nanostructures dissolve into the electrolyte gradually. But for the entire, the WNRs-3 is fairly stable after 10000th cyclic voltammetry and 1000th galvanostatic charge-discharge tests.

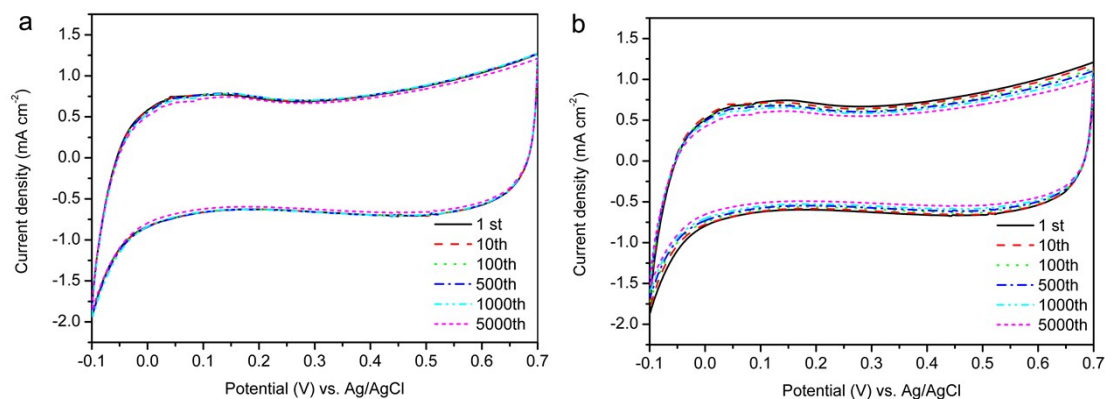

Fig. S4 Cyclic voltammograms of WNRs-3 at different cycles. (a) before repeated galvanostatic charge-discharge. (b) after repeated galvanostatic charge-discharge.
